# Supplementary material
Source: PubMed Central journal article supplement (PMC4270145)
Supplement: Supp_Fig1.pdf [file Supp_Fig1.pdf]

## Supplementary Data

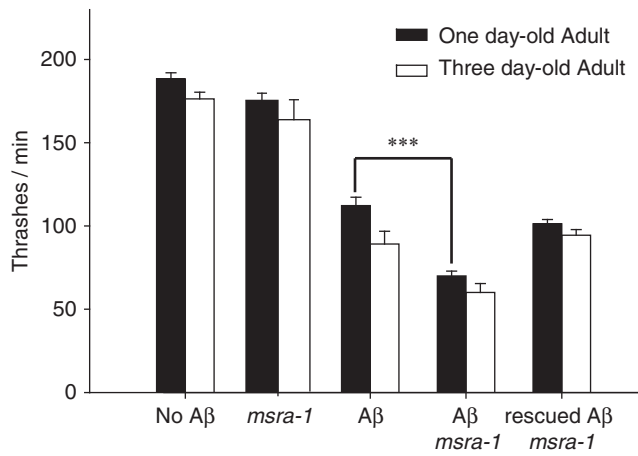

**SUPPLEMENTARY FIG. S1. The deletion of the *msra-1* gene worsens the locomotory impairments of Aβ transgenic worms during different ages of adulthood.** The graph shows the quantification of movement in liquid medium (thrashes per minute) of 1-day-old and 3-day-old adult worms. Data are means ± SE from at least 45 animals per strain. Student's *t*-test was used for statistical analysis. \*\*\* $p \leq 0.0001$
