# Supplementary material
Source: PubMed Central journal article supplement (PMC4270145)
Supplement: Supp_Fig2.pdf [file Supp_Fig2.pdf]

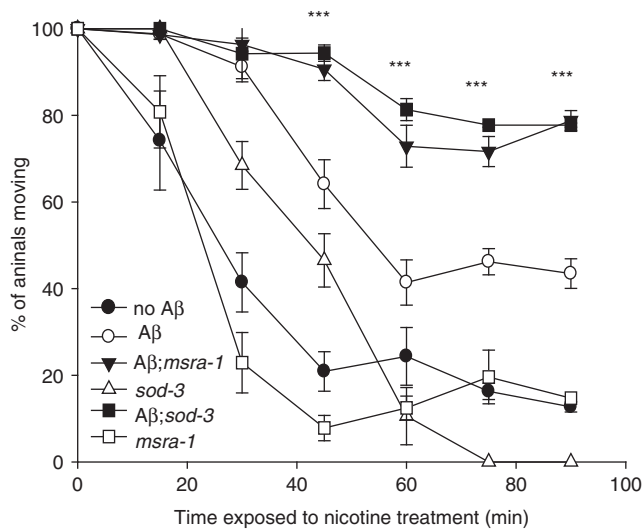

**SUPPLEMENTARY FIG. S2. The absence of MSRA-1 exacerbates synaptic dysfunction in the A $\beta$  transgenic worms.** The graph shows the time course of paralysis in response to nicotine (31 mM). One-day-old control worms (CL2122), A $\beta$  transgenic worms (CL2120), A $\beta$ ; *msra-1* worms (ANM19), and A $\beta$ ; *msra-1* worms rescued with the wild-type *msra-1* gene (ANM45) were assayed on nicotine plates. The absence of MSRA-1 increases the nicotine resistance of the A $\beta$  strain. The *msra-1* rescued strain ANM45 shows the same behavior as the A $\beta$  strain. \*\*\* $p \leq 0.0001$  comparing the A $\beta$  transgenic worms with A $\beta$ ; *msra-1* worms.
