# Supplementary material
Source: PubMed Central journal article supplement (PMC4270145)
Supplement: Supp_Fig3.pdf [file Supp_Fig3.pdf]

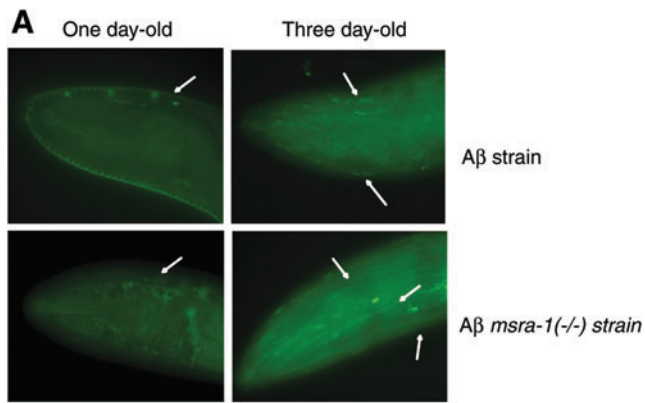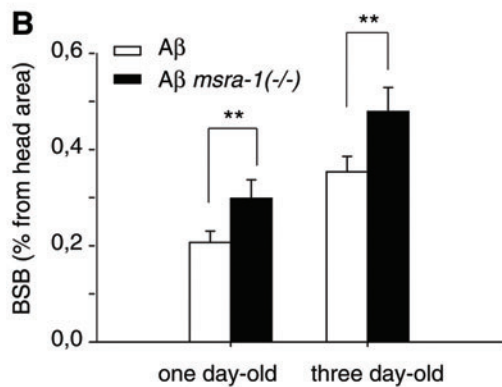

**SUPPLEMENTARY FIG. S3. MSRA-1 modulates A $\beta$  aggregation *in vivo*.** (A) BSB staining of 1-day-old and 3-day-old A $\beta$  worms (*top image*) and A $\beta$ ; *msra-1* worms (*bottom image*). The *arrows* show BSB-positive areas that are increased in the absence of *msra-1*. (B) The graph shows quantification of the BSB positive areas in the head of the animal.  $n \geq 30$  \*\*\* $p \leq 0.0001$ . Student's *t*-test was used for statistical analysis.
