# Supplementary material
Source: PubMed Central journal article supplement (PMC4270145)
Supplement: Supp_Fig4.pdf [file Supp_Fig4.pdf]

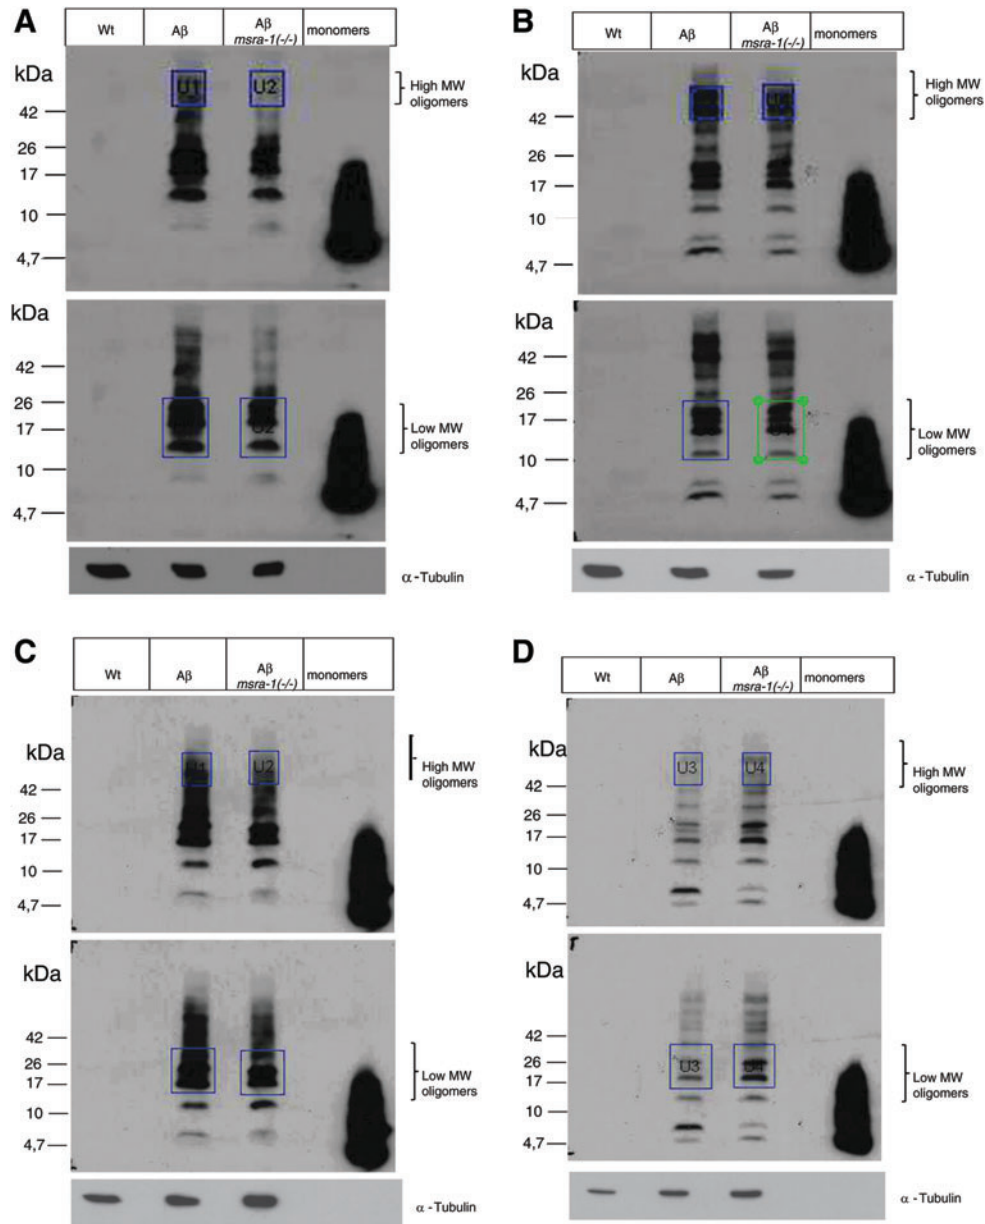

**E Densitometry measurements (Arbitrary Units)**

|   | High MW oligomers |                            | Low MW oligomers |                            |
|---|-------------------|----------------------------|------------------|----------------------------|
|   | A $\beta$         | A $\beta$ ; <i>msra</i> -1 | A $\beta$        | A $\beta$ ; <i>msra</i> -1 |
| A | 27083.5           | 21418.5                    | 33282.6          | 30697.2                    |
| B | 30247.7           | 28639                      | 31022.1          | 29021                      |
| C | 27284.7           | 22202.6                    | 33274.4          | 32694                      |
| D | 12973.9           | 16315.7                    | 17674.4          | 24396.8                    |

**SUPPLEMENTARY FIG. S4. Analysis of oligomeric species.** (A–D) Western blots from wild-type, A $\beta$ , and A $\beta$ ; *msra-1* worms. Bands of higher MW decrease in intensity in the absence of *msra-1*. (E) Densitometry measurements of the Western blot bands shown in (A–D).
