# Supplementary material
Source: PubMed Central journal article supplement (PMC4270145)
Supplement: Supp_Fig5.pdf [file Supp_Fig5.pdf]

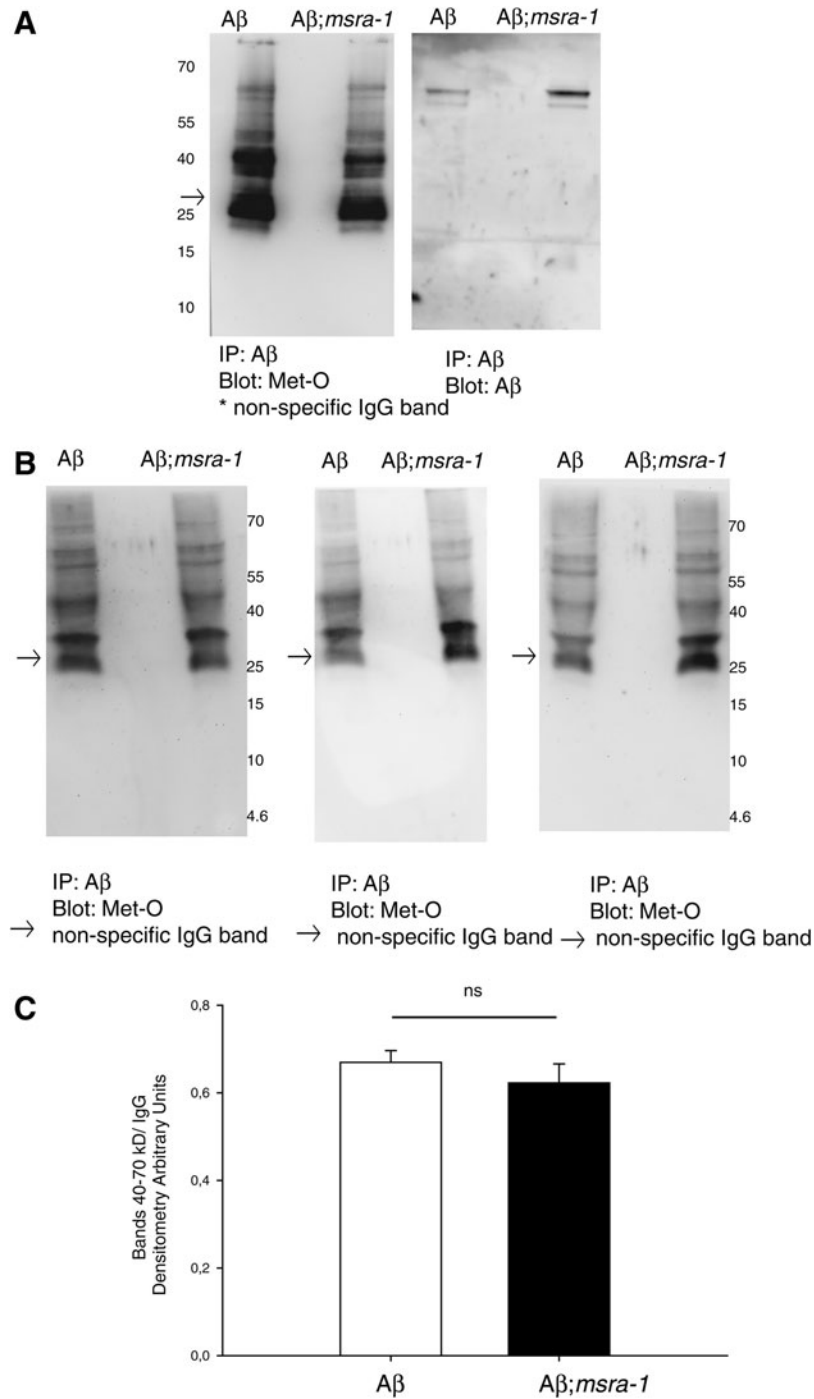

**SUPPLEMENTARY FIG. S5. Aβ is oxidized in Met35.** (A, B) show different Aβ immunoprecipitation assays from strain Aβ (CL4176) and Aβ;*msra-1* (ANM12), 24 h after temperature induction. Aβ was immunoprecipitated with the 6E10 antibody. For the Western blots, we used the anti-methionine sulfoxide antibody. (A) For the Western blot on the right, the anti Aβ antibody 6E10 was used. (C) Densitometric quantification of bands between 40 and 70 kDa normalized with IgG bands. Data are means SEM from the three Western blots shown in (B). Student's *t*-test was used for statistical analyses. ns, no statistical difference.
